# Supplementary figures and images for: Antioxidant activity and inhibitory effects of 2-hydroxy-3-methylcyclopent-2-enone isolated from ribose–histidine Maillard reaction products on aldose reductase and tyrosinase
Source: Royal Society of Chemistry journal article supplement (doi:10.1039/c7fo01438d), 2018-01-01

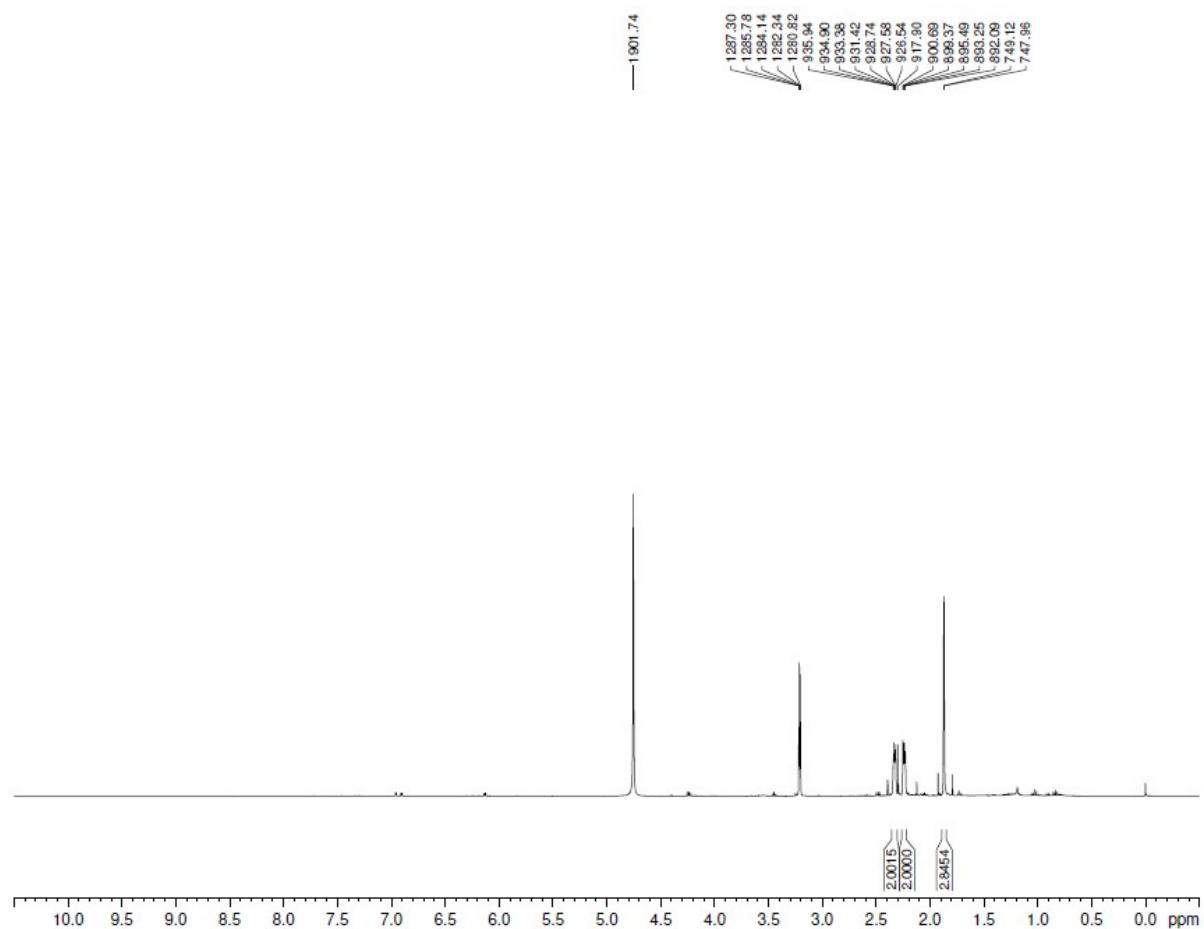

Fig. S1  $^1\text{H}$  NMR spectrum of compound 1

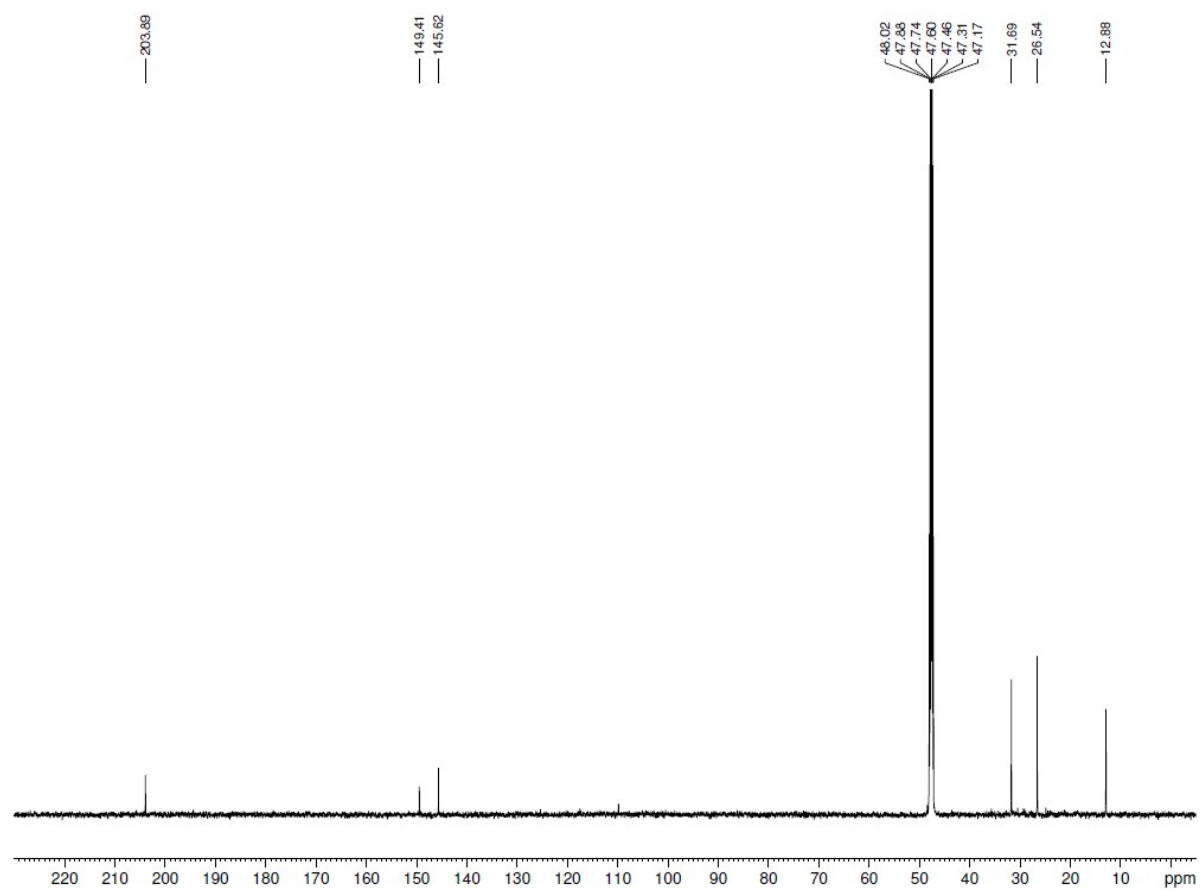

Fig. S2  $^{13}\text{C}$  NMR spectrum of compound 1

Supplement: c7fo01438d1.pdf [file c7fo01438d1.pdf]
